# Supplementary material
Source: MDPI journal article supplement (https://www.mdpi.com/2079-6412/13/5/887)
Supplement: s1 [file s1]

# Supplementary Materials: Migration of TiO<sub>2</sub> from PET/TiO<sub>2</sub> Composite Films Used for Polymer-Laminated Steel Cans in Acidic Solution

Jingying Cui <sup>1,\*</sup>, Jinyang Chen <sup>1,\*</sup>, Jie Gu <sup>2</sup>, Xiaomin Hong <sup>1</sup>, Menghan Hong <sup>1</sup>, Zheyang Wu <sup>2</sup> and Yu Hu <sup>2</sup>

<sup>1</sup> Chemical Engineering and Technology, Shanghai University, Shanghai 200444, China

<sup>2</sup> Shanghai Bao Steel Packaging Co., Ltd., Shanghai 200949, China

\* Correspondence: qtaacui@shu.edu.cn (J.C.); chenjy@shu.edu.cn (J.C.);

Tel.: +86-21-6613-7729 (Jinyang Chen)

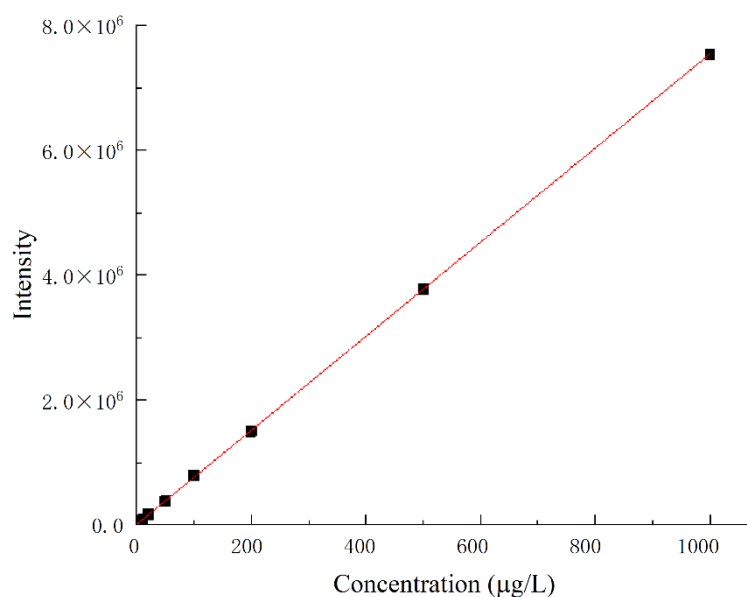

**Figure S1.** The standard curve of Ti measured by ICP-OES.
